# Supplementary material for: Interactions between Vitamin D Status, Calcium Intake and Parathyroid Hormone Concentrations in Healthy White-Skinned Pregnant Women at Northern Latitude
Source: MDPI journal article supplement (doi:10.3390/nu10070916), 2018-07-17
Supplement: s1 [file s1]

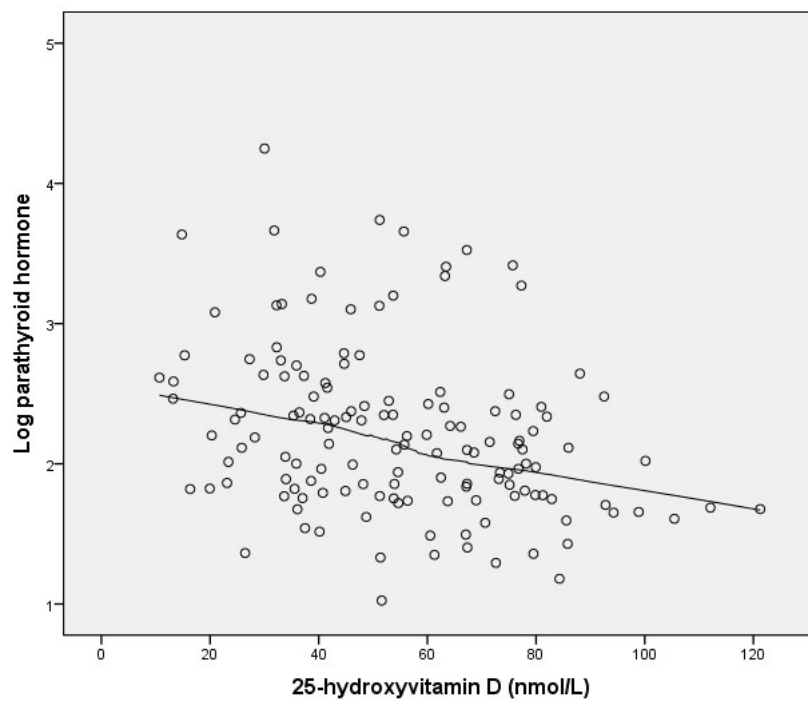

**Figure S1.** Scatterplot of log parathyroid hormone and 25-hydroxyvitamin D in 142 pregnant women. A lowess curve (solid line) depicts the relationship between log parathyroid hormone and 25-hydroxyvitamin D.

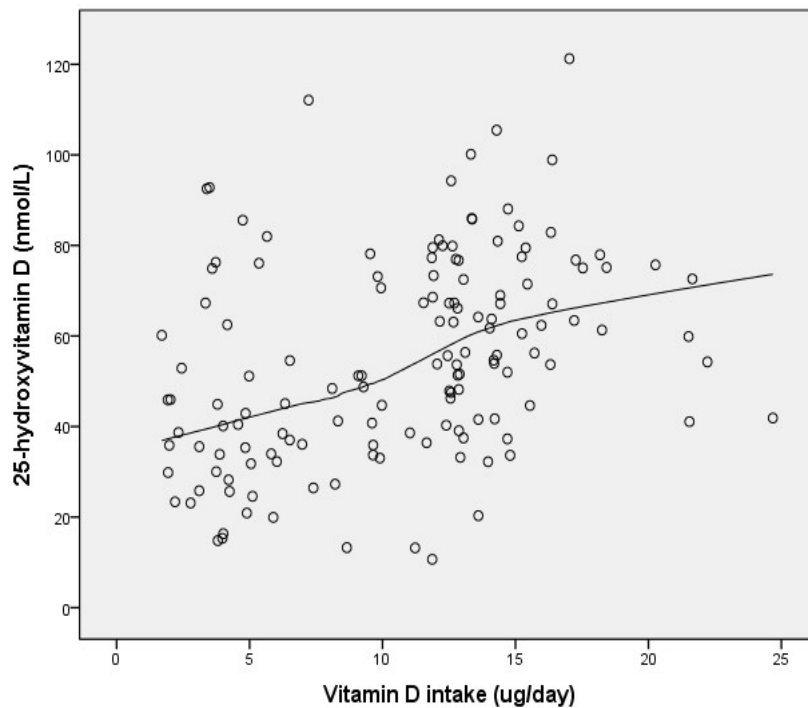

**Figure S2.** Scatterplot of 25-hydroxyvitamin D and vitamin D intake in 142 pregnant women. A lowess curve (solid line) depicts the relationship between 25-hydroxyvitamin D and vitamin D intake.
